# Supplementary material for: Copy number variation in the speciation of pigs: a possible prominent role for olfactory receptors
Source: PubMed Central journal article supplement (PMC4413995; doi:10.1186/s12864-015-1449-9), 2015-04-22
Supplement: 12864_2015_1449_MOESM5_ESM.pdf [file 12864_2015_1449_MOESM5_ESM.pdf]

A)

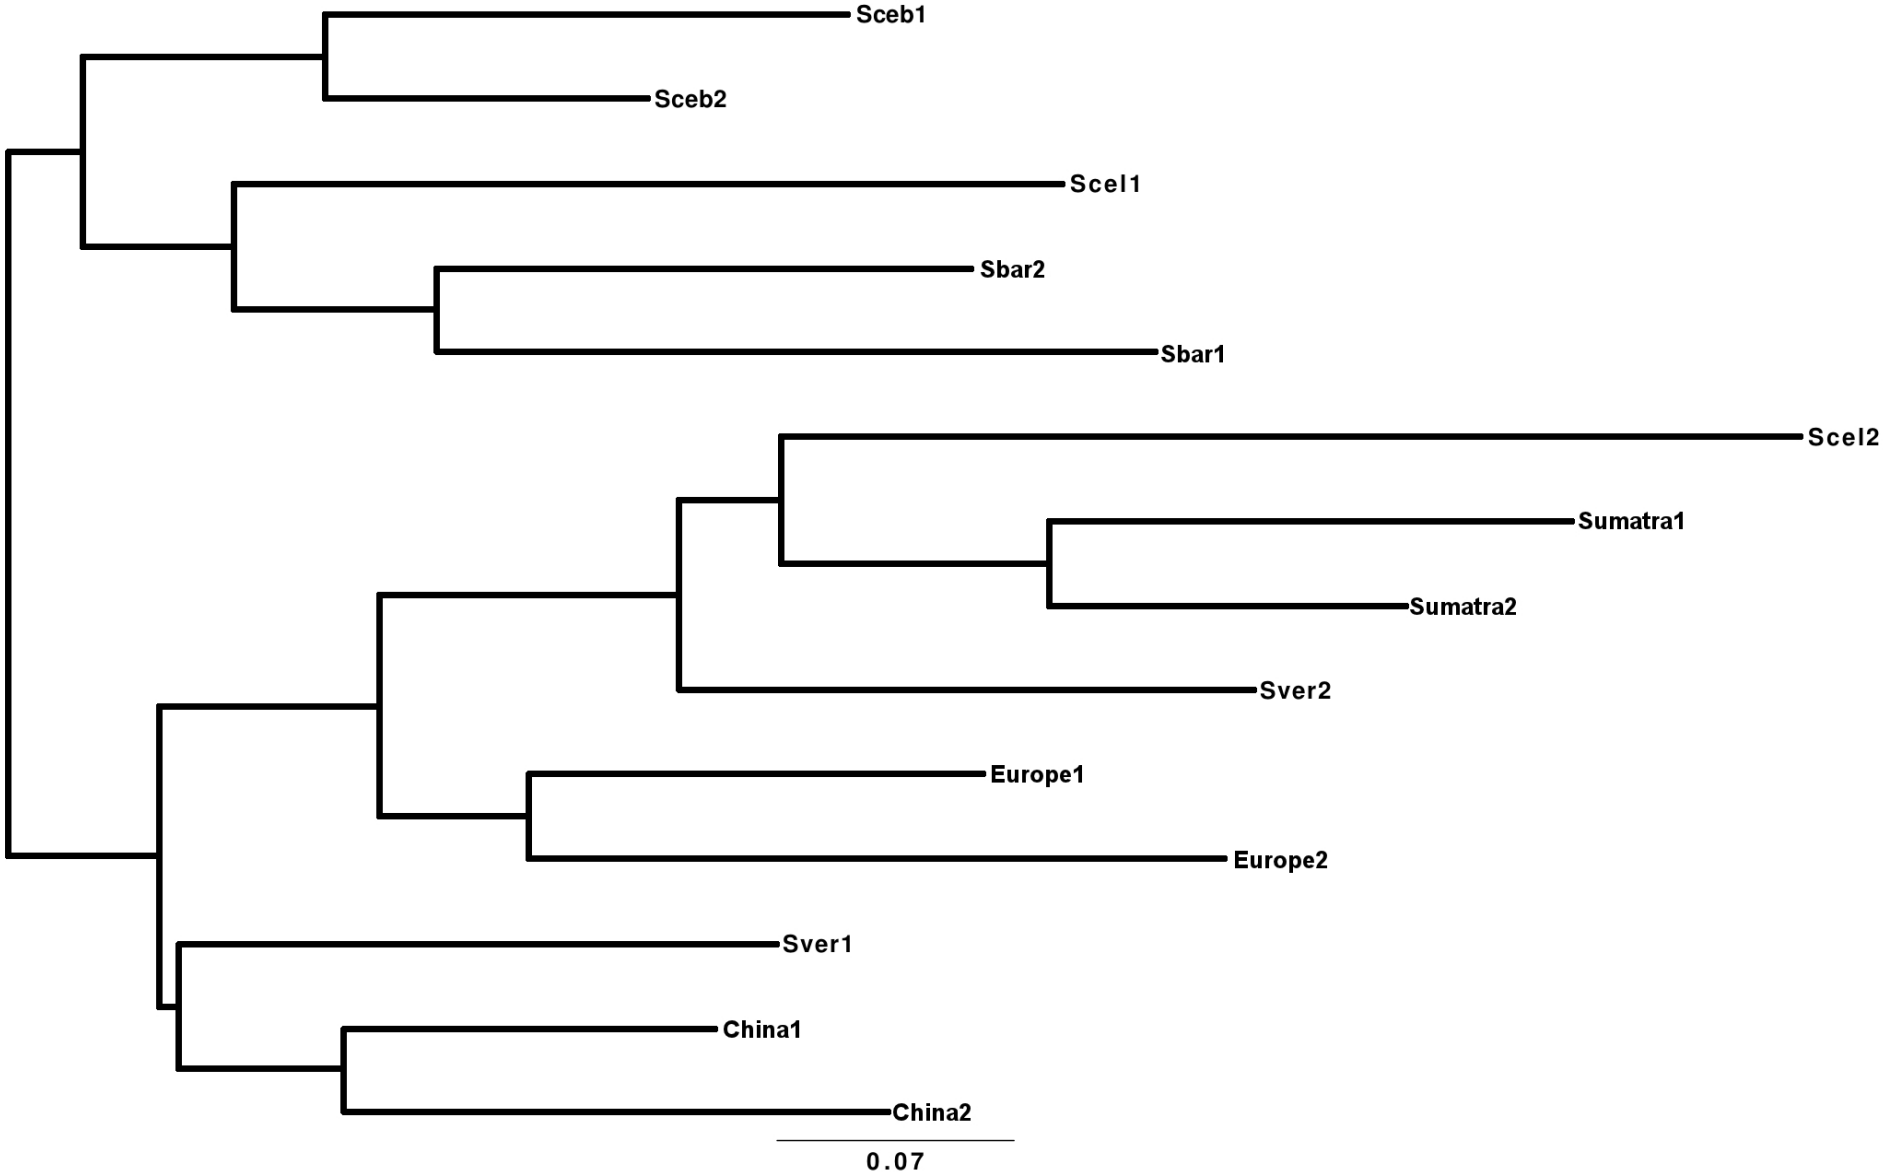

B)

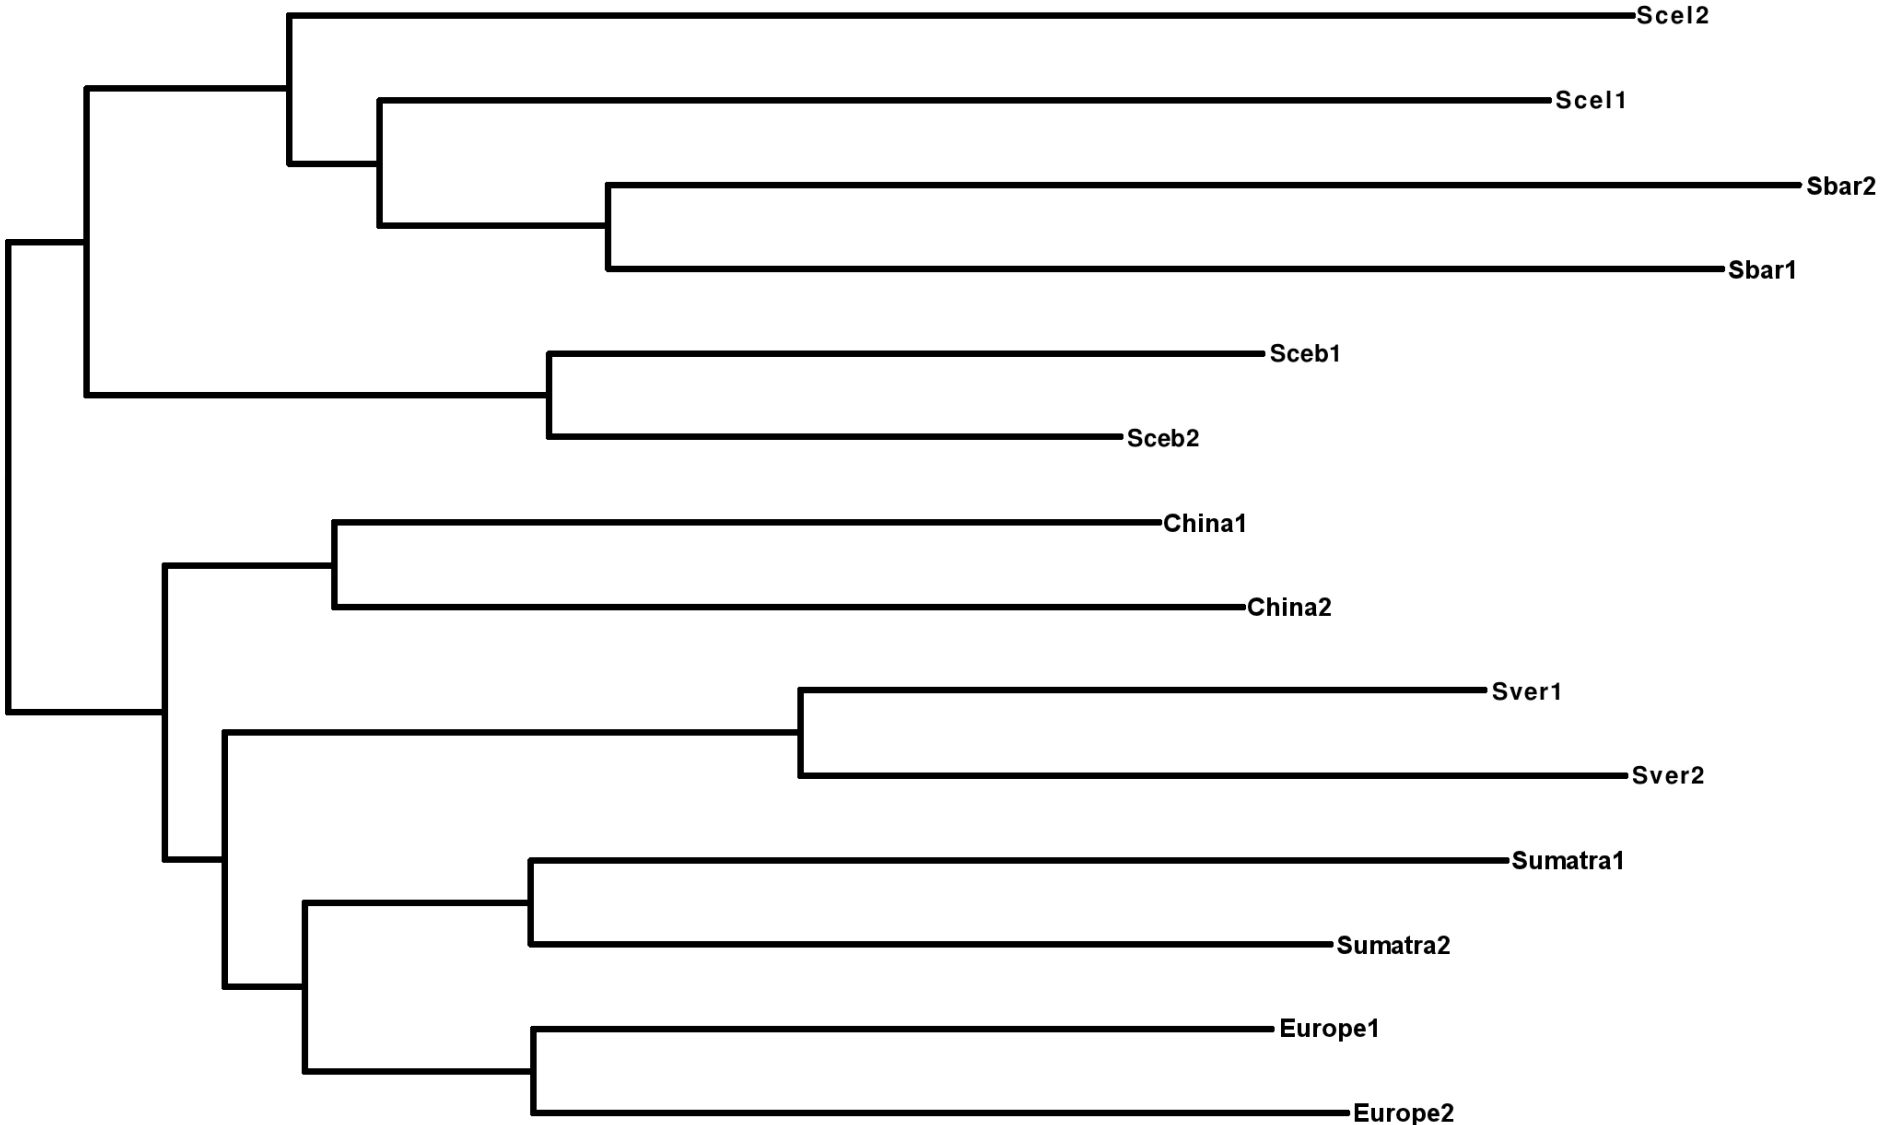

0.05
